# Supplementary material for: A trifunctional Co0.85Se/NC collaborated electrocatalyst enables a self-powered energy system for uninterrupted H2 production
Source: Royal Society of Chemistry journal article supplement (doi:10.1039/d3ta00042g), 2023-01-01
Supplement: d3ta00042g1.pdf [file d3ta00042g1.pdf]

## Supporting Information

### **A trifunctional Co<sub>0.85</sub>Se/NC collaborated electrocatalyst enables a self-powered energy system for uninterrupted H<sub>2</sub> production**

Wen-Wen Tian,<sup>a</sup> Yi-Dai Ying,<sup>a</sup> Jin-Tao Ren,<sup>a</sup> and Zhong-Yong Yuan<sup>a,b,\*</sup>

<sup>a</sup> *National Institute for Advanced Materials, School of Materials Science and Engineering, Nankai University, Tianjin 300350, China*

<sup>b</sup> *Key Laboratory of Advanced Energy Materials Chemistry (Ministry of Education), Nankai University, Tianjin 300071, China*

\* Corresponding author. *E-mail address:* zyyuan@nankai.edu.cn (Z.-Y. Yuan)

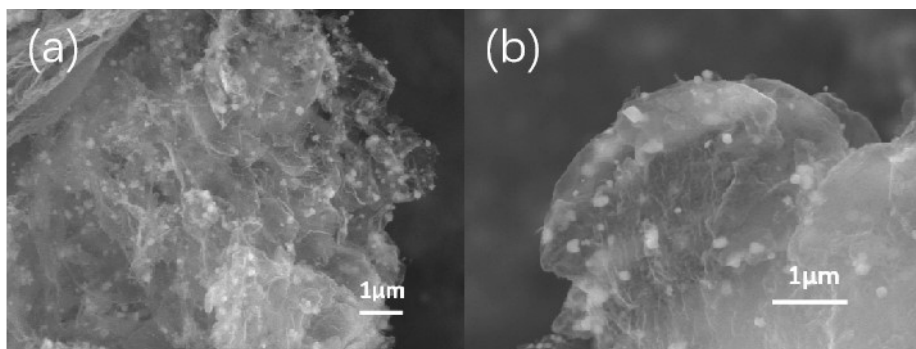

**Fig. S1.** SEM images of CoSe<sub>2</sub>/NC.

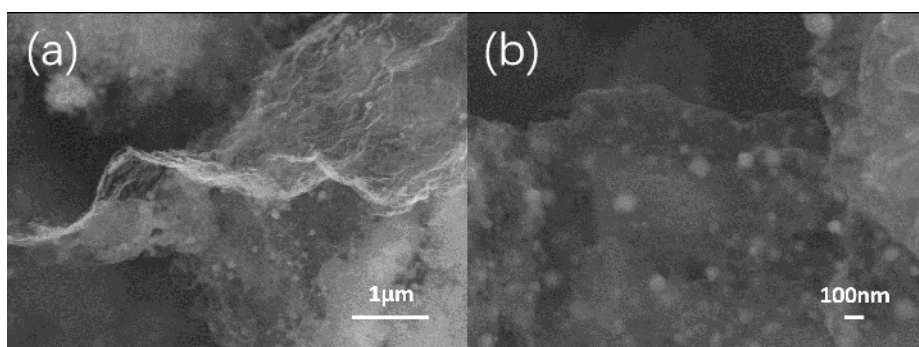

**Fig. S2.** SEM images of CoO/NC.

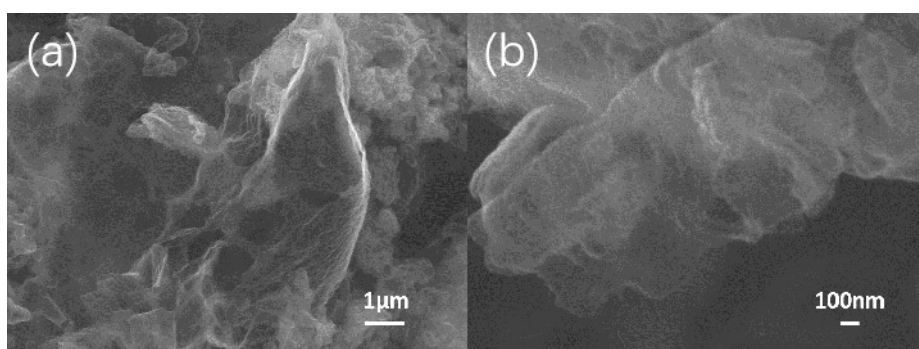

**Fig. S3.** SEM images of NC.

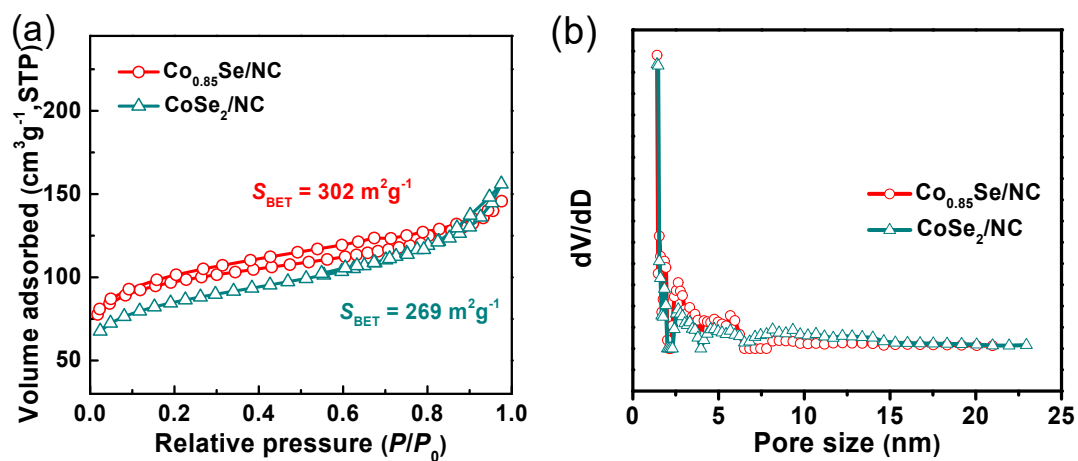

Fig. S4. N<sub>2</sub> adsorption-desorption isotherms and (b) pore size distribution curves of Co<sub>0.85</sub>Se/NC and CoSe<sub>2</sub>/NC catalysts.

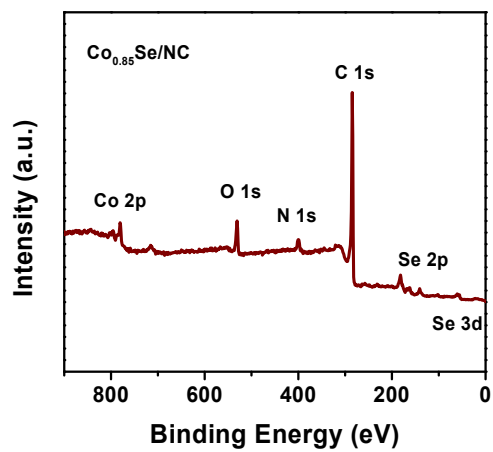

Fig. S5. XPS full spectra of Co<sub>0.85</sub>Se/NC catalysts.

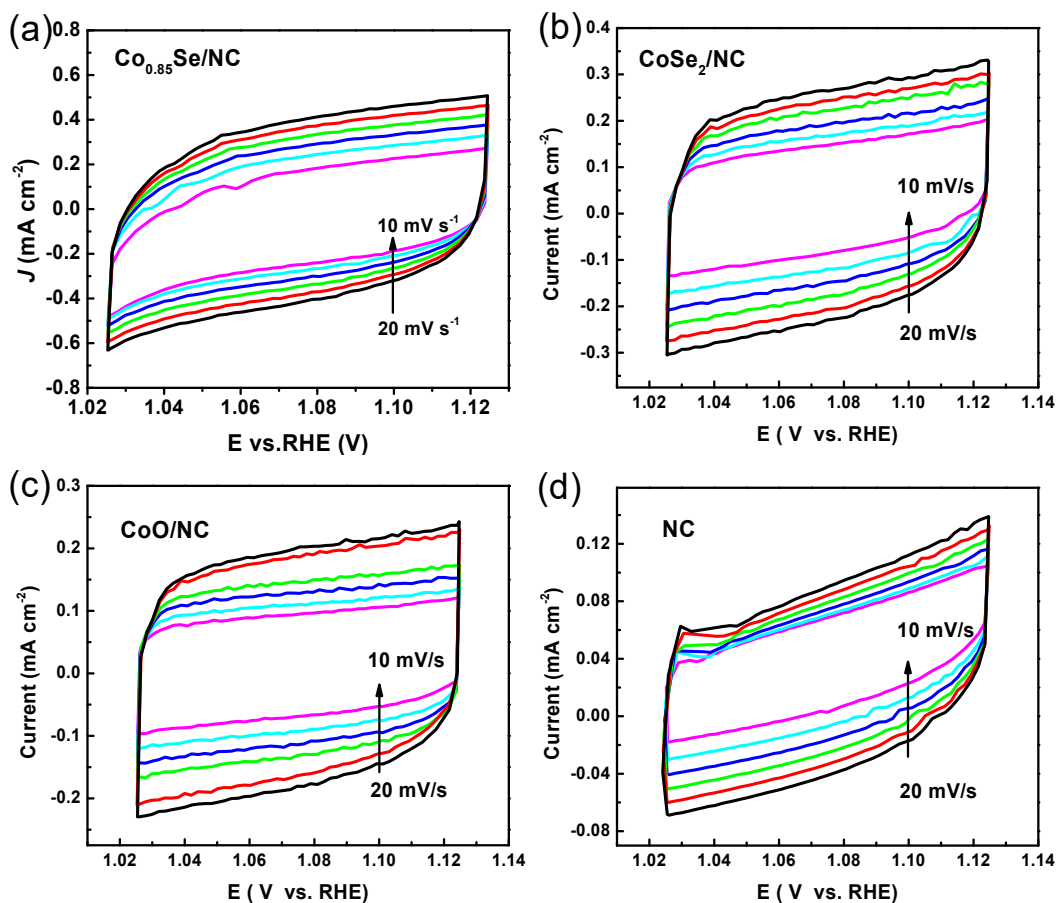

**Fig. S6.** CV curves at different scan rates from 10 to 20  $\text{mV s}^{-1}$  of different samples.

Calculation details of ECSA:

$$\text{ECSA} = C_{\text{dl}}/C_s$$

The electrical double layer capacitance ( $C_{\text{dl}}$ ) values were calculated in terms of cyclic voltammetry (CV) curves at different scan rates from 10 to 20  $\text{mV s}^{-1}$ . The electrochemically active surface area (ECSA) values were derived from the equation  $\text{ECSA} = C_{\text{dl}}/C_s$ , where  $C_s$  is the specific capacitance.[1] The  $C_s$  for a flat surface was in the range of 20-60  $\mu\text{F cm}^{-2}$ , [2] and adopts the value of 60  $\mu\text{F cm}^{-2}$  here to roughly calculate the ECSA.

$$\text{ECSA}_{\text{Co}_{0.85}\text{Se}/\text{NC}} = 23.1 \text{ mF cm}^{-2} / 60 \mu\text{F cm}^{-2} = 385.0 \text{ cm}^{-2}_{\text{ECSA}}$$

$$\text{ECSA}_{\text{CoSe}_2/\text{NC}} = 12.5 \text{ mF cm}^{-2} / 60 \mu\text{F cm}^{-2} = 208.3 \text{ cm}^{-2}_{\text{ECSA}}$$

$$\text{ECSA}_{\text{CoO}/\text{NC}} = 11.6 \text{ mF cm}^{-2} / 60 \mu\text{F cm}^{-2} = 193.0 \text{ cm}^{-2}_{\text{ECSA}}$$

$$\text{ECSA}_{\text{NC}} = 2.7 \text{ mF cm}^{-2} / 60 \mu\text{F cm}^{-2} = 45.0 \text{ cm}^{-2}_{\text{ECSA}}$$

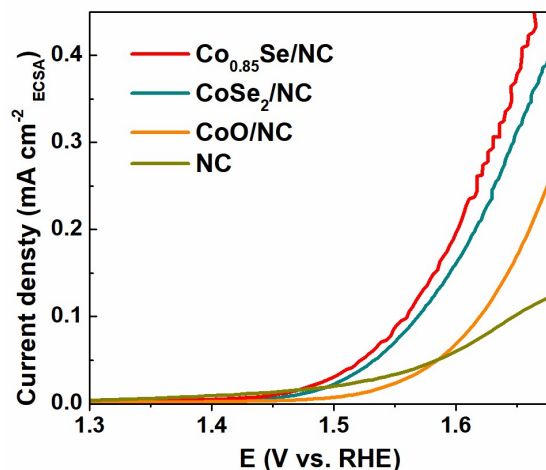

Fig. S7. OER activity of different catalysts in 1.0 M KOH normalized by ECSA.

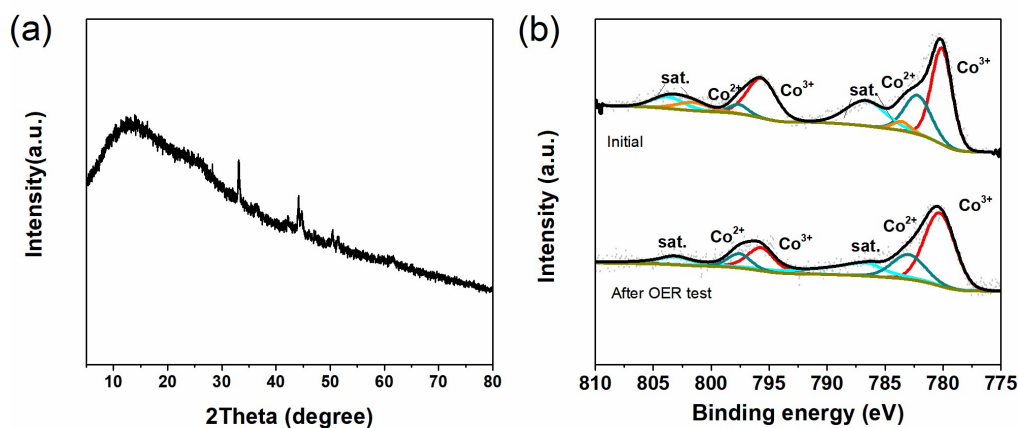

Fig. S8. (a) XRD pattern of Co<sub>0.85</sub>Se/NC after OER test. (b) Co 2p XPS high-resolution spectra of Co<sub>0.85</sub>Se/NC before and after OER test.

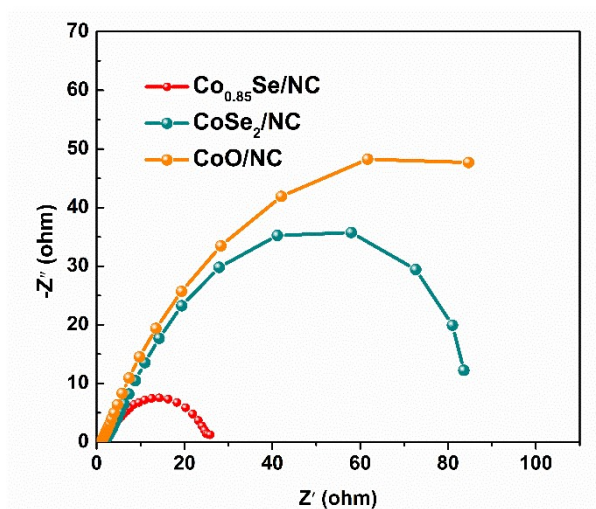

Fig. S9. Electrochemical impedance spectra of prepared catalysts during ORR process.

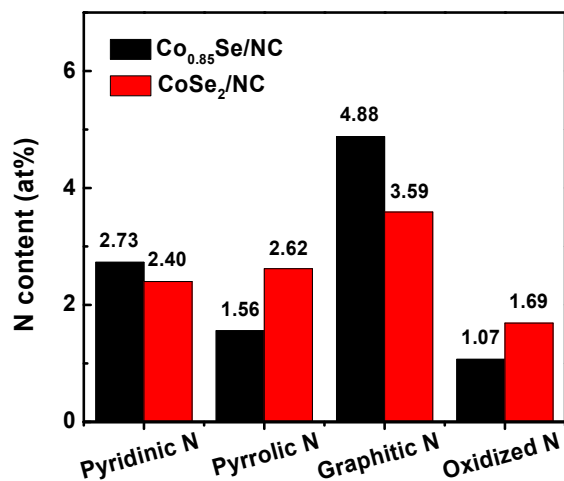

**Fig. S10.** The histogram refers to the content of different N types of Co<sub>0.85</sub>Se/NC and CoSe<sub>2</sub>/NC catalysts.

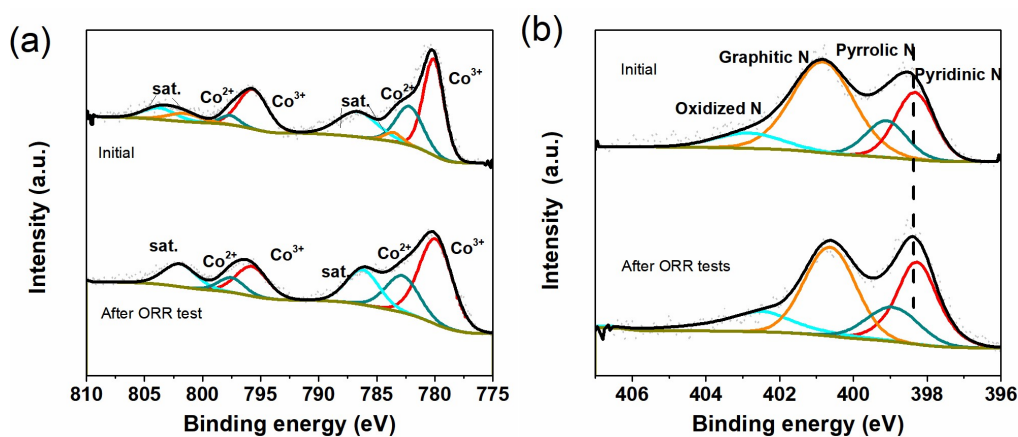

**Fig. S11.** (a) Co 2p and (b) N 1s XPS high-resolution spectra of Co<sub>0.85</sub>Se/NC before and after ORR test.

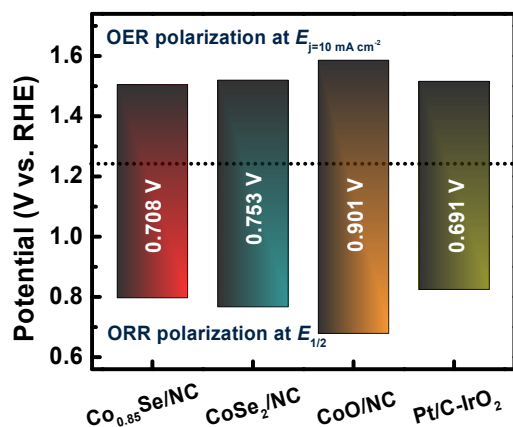

**Fig. S12.** The potential differences between the  $E_{j=10}$  of OER and  $E_{1/2}$  of ORR for different samples.

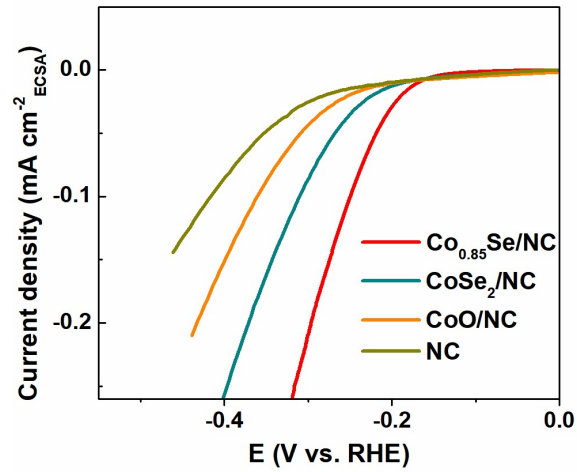

Fig. S13. HER activity of different catalysts in 1.0 M KOH normalized by ECSA.

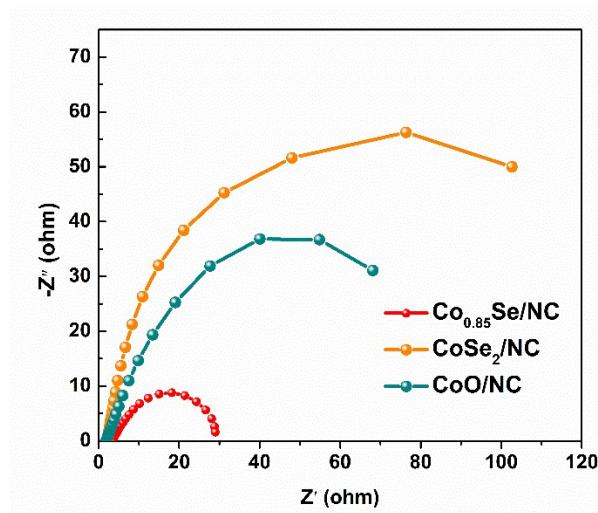

Fig. S14. Electrochemical impedance spectra of prepared catalysts during HER process.

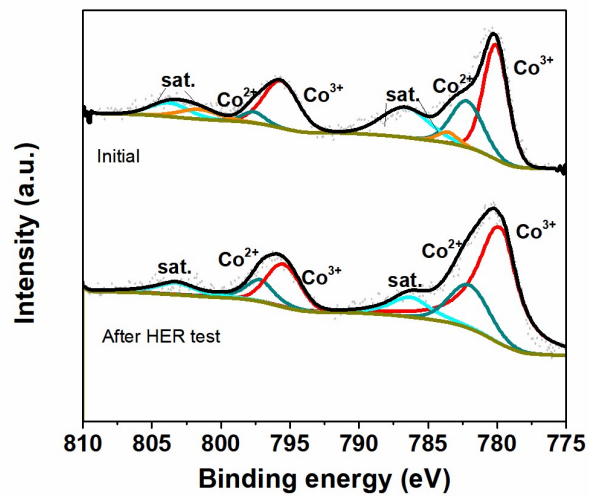

Fig. S15. Co 2p XPS high-resolution spectra of  $\text{Co}_{0.85}\text{Se}/\text{NC}$  before and after HER test.

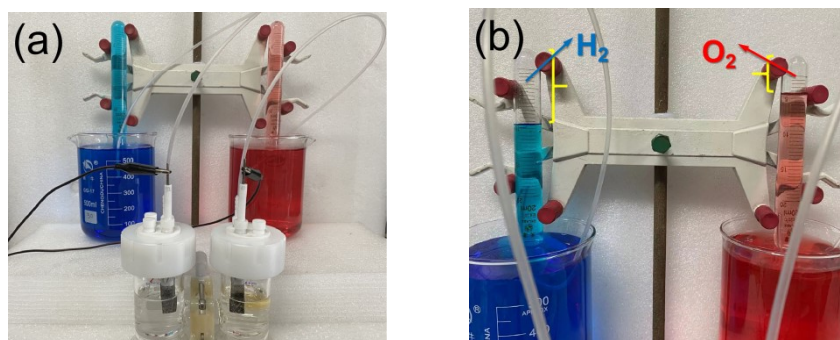

**Fig. S16.** The photographs of the water-gas displacing instrument.

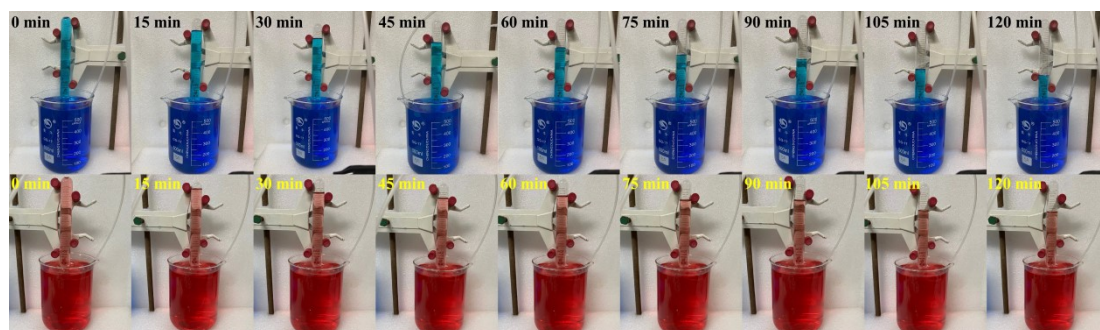

**Fig. S17.** The optical images of the gas collection tubes at fifteen-minute intervals over two-hour period during the overall water splitting process.

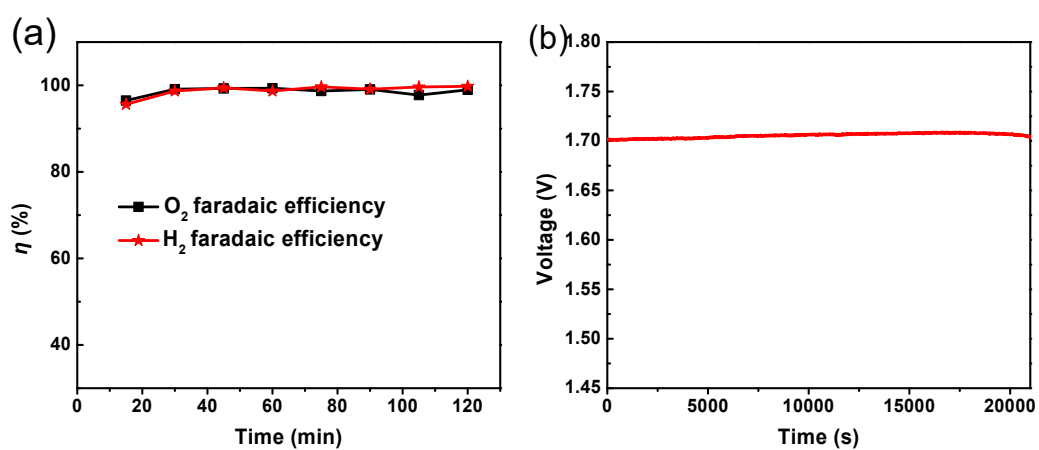

**Fig. S18.** (a) The faradic efficiency of produced H<sub>2</sub> and O<sub>2</sub> during water splitting process. (b) Chronopotentiometry responses of Co<sub>0.85</sub>Se/NC//Co<sub>0.85</sub>Se/NC during water splitting process.



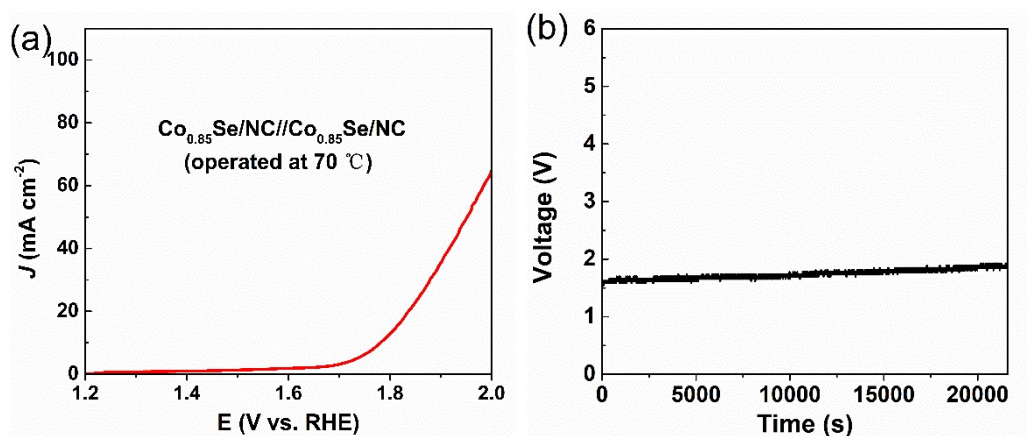

**Fig. S19.** (a) Polarization curves of  $\text{Co}_{0.85}\text{Se}/\text{NC} // \text{Co}_{0.85}\text{Se}/\text{NC}$  cell in 1.0 M KOH electrolyte operated at 70 °C. (b) Chronopotentiometry responses of  $\text{Co}_{0.85}\text{Se}/\text{NC} // \text{Co}_{0.85}\text{Se}/\text{NC}$  during water splitting process operated at 70 °C.

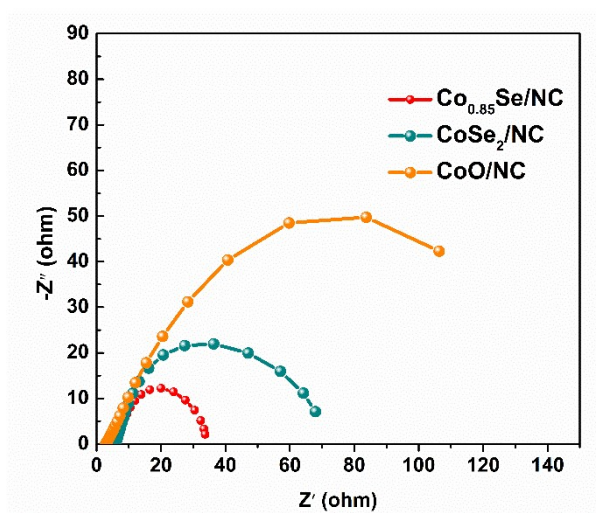

**Fig. S20.** Electrochemical impedance spectra of prepared catalyst-based ZABs.

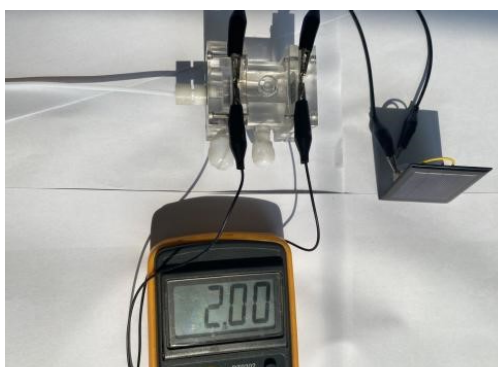

**Fig. S21.** The photograph of the ZAB charged by a solar cell.

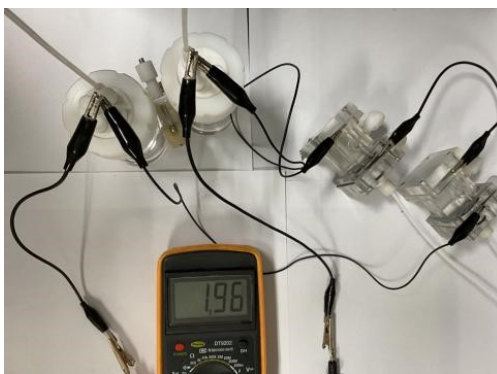

**Fig. S22.** The photographs of the overall water splitting device driven by ZABs.

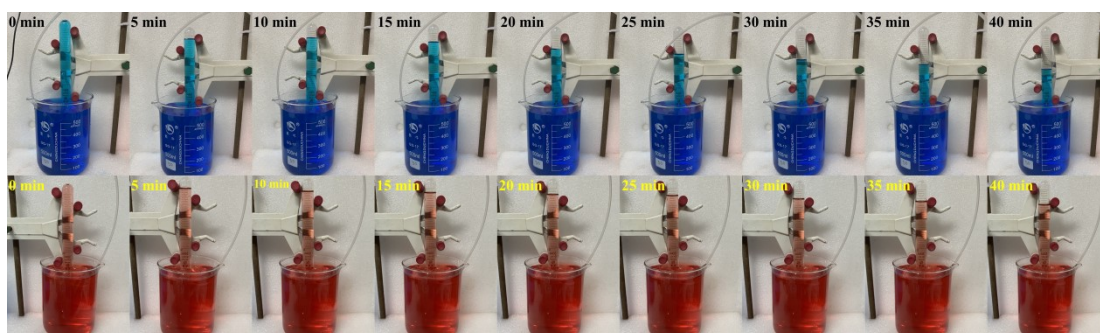

**Fig. S23.** The optical images of the gas collection tubes at fifteen-minute intervals over two-hour period during the overall water splitting process driven by ZABs.

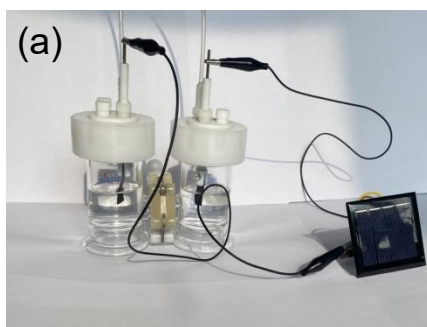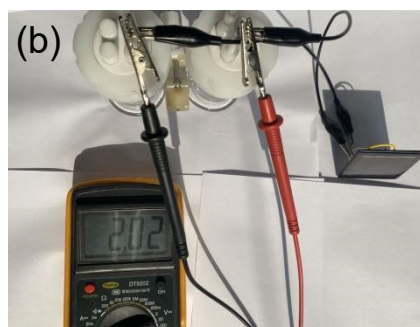

**Fig. S24.** Photographs of the overall water splitting device driven by a solar cell.

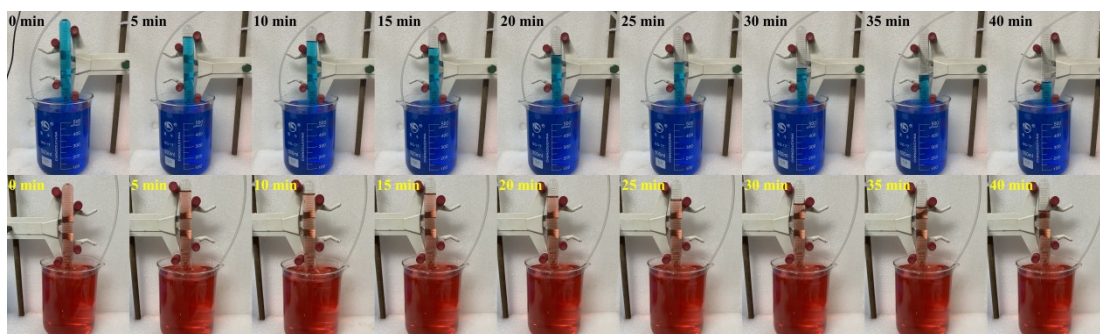

**Fig. S25.** The optical images of the gas collection tubes at fifteen-minute intervals over two-hour period during the overall water splitting process driven by a solar cell.

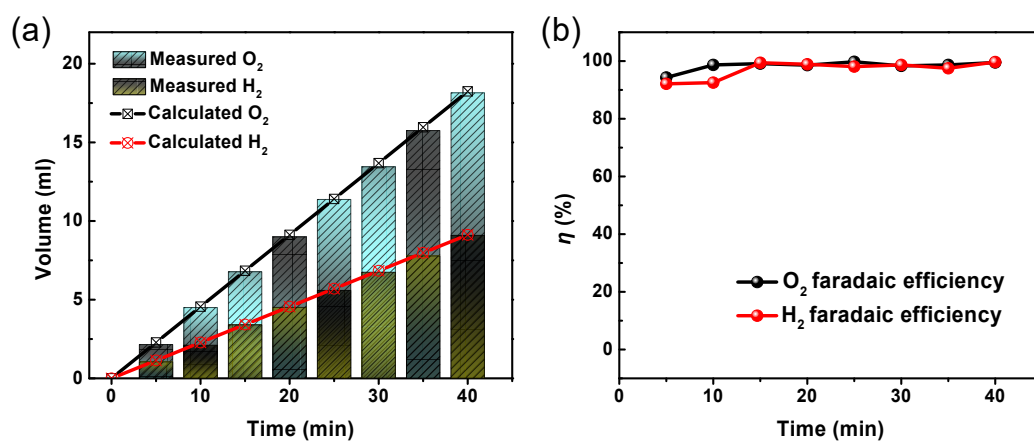

**Fig. S26.** (a) The corresponding measured and calculated gas volumes of H<sub>2</sub> and O<sub>2</sub> during water splitting process driven by a solar cell. (b) The faradaic efficiency of produced H<sub>2</sub> and O<sub>2</sub> during water splitting process driven by a solar cell.

**Table S1.** Comparison of the electrocatalytic activity of recently reported bifunctional Co-based electrocatalysts in alkaline electrolyte.

| Catalyst                                            | $E_{j=10}$ / (V vs. RHE) | $E_{onset}$ / (V vs. RHE) | $E_{1/2}$ / (V vs. RHE) | $E_{gap}$ / (V vs. RHE) | Ref.       |
|-----------------------------------------------------|--------------------------|---------------------------|-------------------------|-------------------------|------------|
| Co <sub>0.85</sub> Se/NC                            | 1.505                    | 0.901                     | 0.797                   | 0.708                   | This work. |
| Co <sub>9</sub> S <sub>8</sub> /Co                  | 1.609                    | 0.91                      | 0.804                   | 0.805                   | [3]        |
| Co <sub>3</sub> Mo <sub>3</sub> N                   | 1.52                     | 0.85                      | 0.75                    | 0.77                    | [4]        |
| Co-POP                                              | 1.57                     | N.A.                      | 0.87                    | 0.70                    | [5]        |
| CoSP-850-10                                         | 1.59                     | N.A.                      | 0.85                    | 0.74                    | [6]        |
| Co <sub>0.85</sub> Se@C nanofibers                  | 1.58                     | N.A.                      | 0.82                    | 0.76                    | [7]        |
| Ag-CeO <sub>2</sub> -Co <sub>3</sub> O <sub>4</sub> | 1.57                     | 0.90.                     | 0.80                    | 0.77                    | [8]        |
| Co-CoN <sub>4</sub>                                 | 1.54                     | 0.91                      | 0.83                    | 0.71                    | [9]        |
| Co/Ru SAs-N-C                                       | 1.568                    | N.A.                      | 0.855                   | 0.713                   | [10]       |
| Co-N-C                                              | 1.459                    | N.A.                      | 0.858                   | 0.601                   | [11]       |
| CoNi/NHCS-TUC-3                                     | 1.686                    | 0.91                      | 0.88                    | 0.806                   | [12]       |
| NiCo <sub>2</sub> O <sub>4</sub> /NLG               | 1.52                     | N.A.                      | 0.85                    | 0.67                    | [13]       |
| CoNiP/PNC                                           | 1.7                      | 0.90                      | 0.84                    | 0.86                    | [14]       |

**Table S2.** Comparison of the overall water splitting activity of recently reported transition metal-based electrocatalysts.

| Catalyst                                   | Substrate    | $E_{j=10}$ / (V vs. RHE) | Ref.       |
|--------------------------------------------|--------------|--------------------------|------------|
| Co <sub>0.85</sub> Se/NC                   | Ni foam      | 1.70                     | This work. |
| FeNiP/NPCS                                 | Ni foam      | 1.71                     | [15]       |
| Ni-N-P                                     | Ni foam      | 1.70                     | [16]       |
| Co <sub>3</sub> Mo <sub>3</sub> N          | Carbon cloth | 1.65                     | [4]        |
| FexNiy/CeO <sub>2</sub>                    | Ni foam      | 1.70                     | [17]       |
| Co <sub>0.82</sub> Ni <sub>0.18</sub> P@NC | Ni foam      | 1.67                     | [18]       |
| NIYSZ                                      | Ni foam      | 1.70                     | [19]       |
| Mo-CoP                                     | Carbon paper | 1.70                     | [20]       |
| Co <sub>3</sub> O <sub>4</sub> @PPy        | Ni foam      | 1.67                     | [21]       |

**Table S3.** The measured and calculated volumes of produced H<sub>2</sub> and O<sub>2</sub> during overall water splitting.

| Times (min) | H <sub>2</sub>             |                              |            | O <sub>2</sub>             |                              |            |
|-------------|----------------------------|------------------------------|------------|----------------------------|------------------------------|------------|
|             | V <sub>measured</sub> (ml) | V <sub>calculated</sub> (ml) | $\eta$ (%) | V <sub>measured</sub> (ml) | V <sub>calculated</sub> (ml) | $\eta$ (%) |
| 0           | 0                          | 0                            | 0          | 0                          | 0                            | 0          |
| 15          | 2.2                        | 2.28                         | 96.49      | 1.09                       | 1.14                         | 95.61      |
| 30          | 4.52                       | 4.56                         | 99.12      | 2.25                       | 2.28                         | 98.68      |
| 45          | 6.79                       | 6.84                         | 99.27      | 3.4                        | 3.42                         | 99.42      |
| 60          | 9.06                       | 9.12                         | 99.34      | 4.5                        | 4.56                         | 98.68      |
| 75          | 11.25                      | 11.4                         | 98.68      | 5.68                       | 5.7                          | 99.65      |
| 90          | 13.55                      | 13.68                        | 99.05      | 6.78                       | 6.84                         | 99.12      |
| 105         | 15.6                       | 15.96                        | 97.74      | 7.95                       | 7.98                         | 99.62      |
| 120         | 18.05                      | 18.24                        | 98.96      | 9.1                        | 9.12                         | 99.78      |

**Table S4.** The performance comparison of present reported rechargeable ZAB based on transition metal-based electrocatalysts.

| Catalyst                                           | Voltage gap (V)                | Peak power density (mW cm <sup>-2</sup> ) | Cycling conditions and stability                                                        | Ref.       |
|----------------------------------------------------|--------------------------------|-------------------------------------------|-----------------------------------------------------------------------------------------|------------|
| Co <sub>0.85</sub> Se/NC                           | 0.92 at 20 mA cm <sup>-2</sup> | 108                                       | 20 mA cm <sup>-2</sup> , 40 min/cycle for 160 h, 4 h/cycle for 180 h, no obvious change | This work. |
| CoNi-NCNT                                          | N.A.                           | 88                                        | 10 mA cm <sup>-2</sup> , 40 min/cycle for 150 cycles                                    | [22]       |
| Fe-Co <sub>4</sub> N@N-C nanosheet array           | 0.80 at 10 mA cm <sup>-2</sup> | 105                                       | 5 mA cm <sup>-2</sup> , 1 h/cycle for 1020 cycles, voltage gap increased ~0.1 V         | [23]       |
| Fe <sub>1</sub> Zn <sub>30</sub> NC <sub>PDI</sub> | N.A.                           | 86                                        | 10 mA cm <sup>-2</sup> for 300 cycles                                                   | [24]       |
| Cu@LSCNC <sub>0.05</sub>                           | N.A.                           | 136                                       | 10 mA cm <sup>-2</sup> , 10 min/cycle for 500 cycles                                    | [25]       |
| FeN <sub>x</sub> /CMCC                             | 0.79 at 10 mA cm <sup>-2</sup> | 99.6                                      | 10 mA cm <sup>-2</sup> , 2 h per cycle for 335 h                                        | [26]       |
| Ni <sub>3</sub> Fe/N-C                             | 0.79 at 10 mA cm <sup>-2</sup> | N.A.                                      | 10 mA cm <sup>-2</sup> , 4 h/cycle for 105 cycles; voltage gap increased ~0.20 V        | [27]       |
| Co@pNC                                             | 0.61 at 5 mA cm <sup>-2</sup>  | 150.3                                     | 5 mA cm <sup>-2</sup> , 10 min per cycle for 400cycles                                  | [28]       |
| Co-SA/N-C <sub>900</sub>                           | N.A.                           | 191.11                                    | 10 mA cm <sup>-2</sup> , 10 min/cycle for 585 cycles                                    | [29]       |

**Table S5.** The measured and calculated volumes of produced H<sub>2</sub> and O<sub>2</sub> during overall water splitting driven by ZABs.

| Times<br>(min) | H <sub>2</sub>                |                                 |       | O <sub>2</sub>                |                                 |       |
|----------------|-------------------------------|---------------------------------|-------|-------------------------------|---------------------------------|-------|
|                | V <sub>measured</sub><br>(ml) | V <sub>calculated</sub><br>(ml) | η (%) | V <sub>measured</sub><br>(ml) | V <sub>calculated</sub><br>(ml) | η (%) |
| 0              | 0                             | 0                               | 0     | 0                             | 0                               | 0     |
| 5              | 1.65                          | 1.71                            | 96.49 | 0.85                          | 0.855                           | 99.42 |
| 10             | 3.35                          | 3.42                            | 97.95 | 1.65                          | 1.71                            | 96.49 |
| 15             | 5.05                          | 5.13                            | 98.44 | 2.52                          | 2.565                           | 98.25 |
| 20             | 6.79                          | 6.84                            | 99.27 | 3.4                           | 3.42                            | 99.42 |
| 25             | 8.45                          | 8.55                            | 98.83 | 4.15                          | 4.275                           | 97.08 |
| 30             | 10.20                         | 10.26                           | 99.42 | 5.05                          | 5.13                            | 98.44 |
| 35             | 11.75                         | 11.97                           | 98.16 | 5.85                          | 5.985                           | 97.74 |
| 40             | 13.45                         | 13.68                           | 98.32 | 6.75                          | 6.84                            | 98.68 |

**Table S6.** Comparison of reported solar-to-hydrogen conversion efficiency.

|                          |             |            |
|--------------------------|-------------|------------|
| Co <sub>0.85</sub> Se/NC | 4.34%       | This work. |
| NiFeP                    | 4.6%        | [30]       |
| IrCo                     | 1.19%       | [31]       |
| CoP/NGQDsNCs             | (AQE) 0.23% | [32]       |
| RuO <sub>2</sub> /Ti     | 3%          | [33]       |
| ZnO/Au                   | 3.2%        | [34]       |

**Table S7.** The measured and calculated volumes of produced H<sub>2</sub> and O<sub>2</sub> during water splitting driven by a solar cell.

| Times<br>(min) | H <sub>2</sub>                |                                 |       | O <sub>2</sub>                |                                 |       |
|----------------|-------------------------------|---------------------------------|-------|-------------------------------|---------------------------------|-------|
|                | V <sub>measured</sub><br>(ml) | V <sub>calculated</sub><br>(ml) | η (%) | V <sub>measured</sub><br>(ml) | V <sub>calculated</sub><br>(ml) | η (%) |
| 0              | 0                             | 0                               | 0     | 0                             | 0                               | 0     |
| 5              | 2.15                          | 2.28                            | 94.30 | 1.05                          | 1.14                            | 92.11 |
| 10             | 4.5                           | 4.56                            | 98.68 | 2.11                          | 2.28                            | 92.54 |
| 15             | 6.78                          | 6.84                            | 99.12 | 3.4                           | 3.42                            | 99.42 |
| 20             | 8.99                          | 9.12                            | 98.57 | 4.51                          | 4.56                            | 98.90 |
| 25             | 11.37                         | 11.4                            | 99.74 | 5.59                          | 5.7                             | 98.07 |
| 30             | 13.45                         | 13.68                           | 98.32 | 6.75                          | 6.84                            | 98.68 |
| 35             | 15.75                         | 15.96                           | 98.68 | 7.78                          | 7.98                            | 97.49 |
| 40             | 18.15                         | 18.24                           | 99.51 | 9.09                          | 9.12                            | 99.67 |

**The calculation of solar-to-ZAB efficiency:**

$$\eta_{solar-ZAB} = \frac{E_{ZAB\ charge}}{E_{solar\ cell}} = \frac{V * I * t}{S * P * t * EE_{solar\ cell}} =$$

$$\frac{2.0\ V * 9.63\ mA/cm^2 * 10^{-3} * 1\ cm^2}{0.0016\ m^2 * 1000\ W/m^2 * 20\%} * 100 = 6.02\%$$

V: charged voltage of ZAB

I: charged current density

t: reaction time

S: area (0.0016 m<sup>2</sup> in our work)

P: 1000 W m<sup>-2</sup> (the solar irradiation power density on earth at Air Mass 1.5 Global)

[35]

Supposing EE<sub>solar cell</sub> = 20%

**ZAB-to-water splitting efficiency:**

$$\eta_{ZAB-water} = \frac{E_{water\ splitting}}{E_{ZAB\ discharge}} = \frac{U * I * t}{V * I * t} =$$



$$\frac{1.96 V * 45 mA * 10^{-3} * 1 cm^2 * 40 * 60 s}{1.10 V * 2 * 45 mA * 10^{-3} * 1 cm^2 * 40 * 60 s} * 100 = 89.10\%$$

U: voltage of water splitting

I: current density of water splitting

**ZAB-to-H<sub>2</sub> efficiency:**

$$\eta_{ZAB-H_2} = \frac{E_{H_2}}{E_{solar\ cell}} = \frac{\text{standard molar enthalpy of combustion} * n_{(H_2)}}{V * I * t}$$

$$= \frac{285 * 10^3 J/mol * 13.45 mL * 10^{-3} \div 22.4 L/mol}{1.10 V * 2 * 45 mA * 10^{-3} * 1 cm^2 * 40 * 60 s} * 100 = 72.02\%$$

The  $E_{H_2}$  was calculated in terms of the standard molar enthalpy of combustion (-285 kJ/mol) [36].

**Self-powered system efficiency (solar-to-water splitting device):**

$$\eta = \eta_{solar - ZAB} * \eta_{ZAB - H_2} = 6.02\% * 72.02\% = 4.34\%$$

**Solar-to-H<sub>2</sub> efficiency:**

$$\eta = \eta_{solar - ZAB} * \eta_{ZAB - water} = 6.02\% * 89.10\% = 5.36\%$$

**Direct solar-to-H<sub>2</sub> efficiency:**

$$\eta = \frac{E_{H_2}}{E_{solar\ cell}} = \frac{\text{standard molar enthalpy of combustion} * n_{(H_2)}}{P * t} = \frac{285 * 10^3 J/mol * 18.15 mL * 10^{-3} \div 22.4 L/mol}{0.0016 m^2 * 1000 W/m^2 * 40 * 60 s} * 100 = 6.01\%$$

## References:

- [1] G. Chen, T. Wang, J. Zhang, P. Liu, H. Sun, X. Zhuang, M. Chen, X. Feng, *Adv. Mater.*, 2018, **30**, 1706279.
- [2] L. Wu, L. Yu, F. Zhang, B. McElhenny, D. Luo, A. Karim, S. Chen, Z. Ren, *Adv. Funct. Mater.*, 2021, **31**, 2006484.
- [3] K. Cui, Q. Wang, Z. Bian, G. Wang, Y. Xu, *Adv. Energy Mater.*, 2021, **11**, 2102062.
- [4] Y. Yuan, S. Adimi, T. Thomas, J. Wang, H. Guo, J. Chen, J. Attfield, F. J. DiSalvo, M. Yang, *Innovation*, 2021, **2**, 100096.
- [5] H. Lei, Q. Zhang, Z. Liang, H. Guo, Y. Wang, H. Lv, X. Li, W. Zhang, U. Apfel, R. Cao, *Angew. Chem.Int. Ed.*, 2022, **61**, e2022011.
- [6] Y. Wang, K. Wang, J. Yu, Y. Ma, X. Yang, H. Jiang, Y. Liu, J. Li, W. Li, *J. Power Sources*, 2021, 482, 228897.
- [7] L. Gui, Z. Huang, D. Ai, B. He, W. Zhou, J. Sun, J. Xu, Q. Wang, L. Zhao, *Chem. Eur. J.*, 2020, **26**, 4063-4069.
- [8] T. Li, Z. H. X. Li, M. Jiang, Q. Liao, R. Ding, S. Liu, C. Zhao, W. Guo, S. Zhang, H. He, *Surf. Interfaces*, 2022, **33**, 102270.
- [9] K. Ding, J. Hu, J. Luo, L. Zhao, W. Jin, Y. Liu, Z. Wu, G. Zou, H. Hou, X. Ji, *Adv. Funct. Mater.*, 2022, **32**, 2207331.
- [10] L. Zhang, J. Yao, J. Zhang, W. He, Y. Li, L. Liang, C. Liu, H. Liu, *Catal. Sci. Technol.*, 2022, **12**, 5435-5441.
- [11] H.J. Son, M. J. Kim, S.H. Ahn, *Chem. Eng. J.*, 2021, **414**, 128739.
- [12] K. Sheng, Q. Yi, A.L. Chen, Y. Wang, Y. Yan, H. Nie, X. Zhou, *ACS Appl. Mater. Inter.*, 2021, **13**, 45394-45405.
- [13] W. Zhong, X. Zhao, J. Qin, J. Yang, *Chinese J. Chem.*, 2020, **39**, 655-660.
- [14] W. Sun, Y. Xu, P. Yin, Z. Yang, *Appl. Surf. Sci.*, 2021, **554**, 149670.
- [15] J.-T. Ren, Y.-S. Wang, L. Chen, L.-J. Gao, W.-W. Tian, Z.-Y. Yuan, *Chem. Eng. J.*, 2020, **389**, 124408.
- [16] S. Zhang, X. Zhang, H. Zhu, H. Xing, J. Li, E. Wang, *Electrochem. Commun.*, 2020, **114**, 106701.
- [17] L. Chen, H. Jang, M. G. Kim, Q. Qin, X. Liu, J. Cho, *Inorg. Chem. Front.*, 2020, **7**, 470-476.
- [18] T. Xie, B. Wang, S. Yang, Q. Xu, X. Cheng, C. Zhou, J. Hu, *J. Alloys Compd.*, 2022, **621**, 166111.

- [19] S. Sivakumar, S. Yugeswaran, K. V. Sankar, L. Kumaresan, G. Shanmugavelayutham, Y. Tsur, J. Zhu, *J. Power Sources*, 2020, **473**, 228526.
- [20] L. Li, Y. Guo, X. Wang, X. Liu, Y. Lu, *Langmuir* 2021, **37**, 5986-5992.
- [21] Y. Tong, H. Liu, M. Dai, L. Xiao, X. Wu, *Chinese Chem. Lett.*, 2020, **31**, 2295-2299.
- [22] M. Qiao, Y. Wang, T. Wågberg, X. Mamat, X. Hu, G. Zou, G. Hu, *J. Energy Chem.*, 2020, **47**, 146-154.
- [23] J. Yu, B.Q. Li, C.X. Zhao, J.N. Liu, Q. Zhang, *Adv. Mater.*, 2020, **32**, e1908488.
- [24] J. Shen, Q. Liu, Q. Sun, J. Ren, X. Liu, Z. Xiao, C. Xing, Y. Zhang, G. Yang, Y. Chen, *J. Ind. Eng. Chem.*, 2023, **118**, 170-180.
- [25] X. Ou, Q. Liu, F. Wei, C. Sun, Y. Liao, Y. Zhou, F. Yan, *Chem. Eng. J.*, 2023, **451**, 139037.
- [26] Q. Zhou, Z. Yao, X. Zeng, N. Wei, S. Zhang, C. Xiong, *Mater. Today Chem.*, 2022, **24**, 100844.
- [27] Y. Niu, X. Teng, S. Gong, Z. Chen, *J. Mater. Chem. A*, 2020, **8** 13725-13734.
- [28] M. Shen, X. Lin, W. Xi, X. Yin, B. Gao, L. He, Y. Zheng, B. Lin, *J. Colloid Interf. Sci.*, 2023, **633**, 374-382.
- [29] N. Li, L. Li, J. Xia, M. Arif, Sh. Zhou, F. Yin, G. He, H. Chen, *J. Mate. Sci. Technol.*, 2023, **10**, 224-231.
- [30] R. Yang, X. Zheng, M. Qin, B. Lin, X. Shi, Y. Wang, *Adv. Sci.*, 2022, 2201594.
- [31] D. D. Babu, Y. Huang, G. Anandhababu, X. Wang, R. Si, M. Wu, Q. Li, Y. Wang, J. Yao, *J. Mater. Chem. A*, 2019, **7**, 8376-8383.
- [32] Z. Zhong, J. Liu, X. Xu, A. Cao, Z. Tao, W. You, L. Kang, *J. Mater. Chem. A*, 2021, **9**, 2404-2413.
- [33] S. Esiner, J. Wang, R. Janssen, *Cell Rep. Phys. Sci.*, 2020, **1**, 100058.
- [34] Y. Wang, W. Wang, J. Fu, Y. Liang, L. Yao, T. Zhu, *Renewable Energy*, 2021, 168, 647-658.
- [35] J. Qi, W. Zhang, R. Cao, *Adv. Energy Mater.*, 2018, **8**, 1701620.
- [36] J. Li, D. Chu, D. R. Baker, A. Leff, P. Zheng, R. Jiang, *ACS Appl. Energy Mater.*, 2021, **4**, 9969-9981.
